# Supplementary material for: Oxygraphy Versus Enzymology for the Biochemical Diagnosis of Primary Mitochondrial Disease
Source: Metabolites. 2019 Oct 10;9(10):220. doi: 10.3390/metabo9100220 (PMC6835216; doi:10.3390/metabo9100220)
Supplement: Supplementary file 1 [file metabolites-09-00220-s001.pdf]

1   **Supplementary:**

2       **Table S1. Retrospective clinical diagnostic prediction scoring of genetically confirmed PMD**  
3       **patients.** A score of  $\geq 2$  indicates the likeliness of a PMD, which is used clinically to initiate follow up  
4       of biochemical and genetic testing. Abbreviations: CC, corpus callosum; CSF: cerebrospinal fluid;  
5       EMG, electromyogram; FTT, failure to thrive; GI, gastrointestinal; MRS, magnetic resonance  
6       spectroscopy; WM: white matter.

| Identifier # | Mutated gene or complex | Muscle   |               |                           |                      |       | Neurological     |                     |              |          |        | Multi system |            |                            |       |                  | Combined clinical |                     |           |        |                | Metabolic and imaging  |                |       |                  |       | All              |         |         |                           |                                  |                         |                      |            |                      |                |                                                                 |                                |                                               |                                              |       |                  |                  |   |   |
|--------------|-------------------------|----------|---------------|---------------------------|----------------------|-------|------------------|---------------------|--------------|----------|--------|--------------|------------|----------------------------|-------|------------------|-------------------|---------------------|-----------|--------|----------------|------------------------|----------------|-------|------------------|-------|------------------|---------|---------|---------------------------|----------------------------------|-------------------------|----------------------|------------|----------------------|----------------|-----------------------------------------------------------------|--------------------------------|-----------------------------------------------|----------------------------------------------|-------|------------------|------------------|---|---|
|              |                         | Myopathy | Abnormale EMG | Motor developmental delay | Exercise intolerance | Total | Maximum out of 2 | Developmental delay | Speech delay | Dystonia | Ataxia | Spasticity   | Neuropathy | Seizures or encephalopathy | Total | Maximum out of 2 | GI tract          | Growth delay or FTT | Endocrine | Immune | Eye & auditory | Renal tubular acidosis | Cardiomyopathy | Total | Maximum out of 3 | Total | Maximum out of 4 | Lactate | Alanine | Krebs cycle intermediates | Ethyl or methyl malonic aciduria | 3 methyl glutacnic acid | CSF lactate, alanine | Leigh like | Stroke like episodes | Lactate on MRS | Leukoencephalopathy with brain stem and spinal cord involvement | Cavitating leukoencephalopathy | Leukoencephalopathy with thalamus involvement | Deep cerebral WM involvement and CC agenesis | Total | Maximum out of 4 | Maximum out of 8 |   |   |
| 45           | TMEM126B                | 1        | 0             | 0                         | 1                    | 2     | 2                | 0                   | 0            | 0        | 0      | 0            | 0          | 0                          | 0     | 0                | 0                 | 0                   | 0         | 0      | 0              | 0                      | 0              | 0     | 0                | 2     | 2                | 2       | 1       | 0                         | 0                                | 0                       | 1                    | 0          | 0                    | 0              | 0                                                               | 0                              | 0                                             | 0                                            | 4     | 6                | 6                |   |   |
| 30           | ACAD9                   | 0        | 0             | 0                         | 1                    | 1     | 1                | 0                   | 0            | 0        | 0      | 0            | 0          | 0                          | 0     | 0                | 0                 | 0                   | 0         | 0      | 0              | 0                      | 1              | 1     | 1                | 2     | 2                | 2       | 2       | 1                         | 1                                | 0                       | 1                    | 0          | 0                    | 0              | 0                                                               | 0                              | 0                                             | 5                                            | 6     | 6                |                  |   |   |
| 33           | MT-ND1                  | 0        | 0             | 1                         | 0                    | 1     | 1                | 1                   | 1            | 0        | 0      | 0            | 0          | 1                          | 3     | 2                | 0                 | 0                   | 1         | 0      | 0              | 0                      | 0              | 1     | 2                | 2     | 5                | 4       | 2       | 1                         | 1                                | 0                       | 0                    | 1          | 0                    | 0              | 0                                                               | 0                              | 0                                             | 5                                            | 8     | 8                |                  |   |   |
| 48           | ND6                     | 0        | 0             | 0                         | 1                    | 1     | 1                | 0                   | 0            | 1        | 0      | 1            | 1          | 1                          | 4     | 2                | 0                 | 0                   | 0         | 0      | 1              | 0                      | 0              | 1     | 1                | 4     | 4                | 0       | 0       | 0                         | 0                                | 0                       | 1                    | 2          | 0                    | 0              | 0                                                               | 0                              | 0                                             | 3                                            | 7     | 7                |                  |   |   |
| 2737         | NDUFS1                  | 0        | 0             | 1                         | 0                    | 1     | 1                | 1                   | 1            | 0        | 0      | 1            | 0          | 1                          | 4     | 2                | 0                 | 0                   | 1         | 0      | 0              | 0                      | 0              | 1     | 1                | 4     | 4                | 2       | 0       | 1                         | 0                                | 0                       | 1                    | 2          | 0                    | 0              | 0                                                               | 0                              | 0                                             | 0                                            | 6     | 8                | 8                |   |   |
| 2736         | NDUFS2                  | 0        | 0             | 0                         | 0                    | 0     | 0                | 0                   | 0            | 0        | 1      | 0            | 1          | 1                          | 2     | 2                | 0                 | 0                   | 0         | 0      | 0              | 0                      | 0              | 0     | 0                | 2     | 2                | 0       | 0       | 0                         | 0                                | 0                       | 1                    | 2          | 0                    | 1              | 0                                                               | 0                              | 0                                             | 4                                            | 6     | 6                |                  |   |   |
| 2497         | NDUFA13 AND PGM1        | 0        | 0             | 1                         | 0                    | 1     | 1                | 1                   | 1            | 1        | 0      | 1            | 0          | 1                          | 5     | 2                | 0                 | 0                   | 1         | 0      | 0              | 1                      | 0              | 2     | 2                | 5     | 4                | 2       | 1       | 0                         | 0                                | 0                       | 1                    | 2          | 0                    | 1              | 0                                                               | 0                              | 0                                             | 5                                            | 8     | 8                |                  |   |   |
| 52           | SURF1                   | 1        | 0             | 1                         | 0                    | 2     | 2                | 0                   | 0            | 0        | 1      | 0            | 0          | 1                          | 2     | 2                | 0                 | 0                   | 1         | 0      | 0              | 0                      | 1              | 1     | 3                | 3     | 7                | 4       | 2       | 0                         | 1                                | 1                       | 0                    | 2          | 0                    | 0              | 0                                                               | 0                              | 0                                             | 0                                            | 6     | 8                | 8                |   |   |
| 55           | SURF1                   | 0        | 0             | 1                         | 0                    | 1     | 1                | 1                   | 1            | 0        | 1      | 1            | 0          | 1                          | 5     | 2                | 1                 | 1                   | 0         | 0      | 0              | 1                      | 0              | 3     | 3                | 6     | 4                | 2       | 0       | 1                         | 0                                | 0                       | 1                    | 2          | 0                    | 0              | 0                                                               | 0                              | 0                                             | 0                                            | 6     | 8                | 8                |   |   |
| 2264         | MT-ATP6                 | 0        | 0             | 1                         | 0                    | 1     | 1                | 1                   | 0            | 0        | 1      | 0            | 0          | 1                          | 3     | 2                | 0                 | 0                   | 0         | 0      | 0              | 1                      | 0              | 1     | 1                | 4     | 4                | 2       | 0       | 1                         | 0                                | 0                       | 1                    | 0          | 0                    | 0              | 0                                                               | 0                              | 0                                             | 4                                            | 8     | 8                |                  |   |   |
| 47           | AGK                     | 1        | 0             | 1                         | 0                    | 2     | 2                | 1                   | 1            | 0        | 0      | 0            | 0          | 0                          | 2     | 2                | 0                 | 0                   | 1         | 0      | 0              | 1                      | 0              | 3     | 3                | 7     | 4                | 2       | 1       | 0                         | 0                                | 0                       | 1                    | 0          | 0                    | 0              | 0                                                               | 0                              | 0                                             | 4                                            | 8     | 8                |                  |   |   |
| 34           | EARS2                   | 0        | 0             | 1                         | 0                    | 1     | 1                | 1                   | 1            | 0        | 1      | 0            | 0          | 0                          | 3     | 2                | 0                 | 0                   | 0         | 0      | 0              | 0                      | 0              | 0     | 0                | 3     | 3                | 2       | 0       | 0                         | 0                                | 0                       | 1                    | 0          | 0                    | 1              | 0                                                               | 0                              | 0                                             | 4                                            | 7     | 7                |                  |   |   |
| 43           | MRPL44                  | 1        | 0             | 0                         | 1                    | 2     | 2                | 0                   | 0            | 0        | 1      | 0            | 0          | 1                          | 2     | 2                | 1                 | 0                   | 0         | 1      | 1              | 0                      | 1              | 4     | 3                | 7     | 4                | 0       | 0       | 0                         | 0                                | 0                       | 0                    | 0          | 0                    | 1              | 0                                                               | 0                              | 0                                             | 1                                            | 5     | 5                |                  |   |   |
| 42           | Large mtDNA deletion    | 1        | 1             | 0                         | 0                    | 2     | 2                | 0                   | 0            | 0        | 0      | 0            | 0          | 0                          | 0     | 0                | 0                 | 0                   | 0         | 0      | 0              | 0                      | 0              | 0     | 0                | 2     | 2                | 0       | 0       | 0                         | 0                                | 0                       | 0                    | 0          | 0                    | 0              | 0                                                               | 0                              | 0                                             | 2                                            | 2     | 2                |                  |   |   |
| 41           | Large mtDNA deletion    | 1        | 1             | 0                         | 0                    | 2     | 2                | 0                   | 0            | 0        | 0      | 0            | 0          | 0                          | 0     | 0                | 0                 | 0                   | 0         | 0      | 1              | 0                      | 1              | 2     | 2                | 4     | 4                | 0       | 0       | 0                         | 1                                | 1                       | 0                    | 0          | 0                    | 0              | 0                                                               | 0                              | 2                                             | 6                                            | 6     |                  |                  |   |   |
| 50           | MT-TD                   | 1        | 1             | 0                         | 1                    | 3     | 2                | 0                   | 0            | 0        | 0      | 0            | 0          | 0                          | 0     | 0                | 0                 | 0                   | 0         | 0      | 0              | 0                      | 0              | 0     | 0                | 2     | 2                | 2       | 2       | 1                         | 1                                | 0                       | 0                    | 0          | 0                    | 0              | 0                                                               | 0                              | 0                                             | 4                                            | 6     | 6                |                  |   |   |
| 36           | MT-TE                   | 0        | 0             | 1                         | 1                    | 2     | 2                | 1                   | 1            | 0        | 0      | 0            | 1          | 0                          | 3     | 2                | 0                 | 0                   | 1         | 0      | 0              | 0                      | 0              | 2     | 2                | 6     | 4                | 0       | 0       | 0                         | 0                                | 0                       | 0                    | 0          | 0                    | 0              | 0                                                               | 0                              | 0                                             | 0                                            | 0     | 4                | 4                | 4 |   |
| 57           | MT-TE                   | 1        | 0             | 1                         | 1                    | 3     | 2                | 0                   | 0            | 0        | 0      | 0            | 0          | 0                          | 0     | 0                | 0                 | 0                   | 1         | 0      | 0              | 0                      | 0              | 1     | 1                | 3     | 3                | 2       | 1       | 0                         | 0                                | 1                       | 0                    | 0          | 0                    | 0              | 0                                                               | 0                              | 0                                             | 4                                            | 7     | 7                |                  |   |   |
| 58           | MT-TL1                  | 1        | 0             | 0                         | 1                    | 2     | 2                | 0                   | 0            | 0        | 0      | 0            | 1          | 1                          | 2     | 2                | 0                 | 0                   | 1         | 1      | 1              | 1                      | 1              | 5     | 3                | 7     | 4                | 0       | 0       | 0                         | 0                                | 0                       | 0                    | 0          | 0                    | 0              | 0                                                               | 0                              | 0                                             | 0                                            | 0     | 0                | 4                | 4 | 4 |
| 123          | MT-TL1                  | 1        | 0             | 1                         | 1                    | 3     | 2                | 0                   | 0            | 0        | 0      | 0            | 0          | 0                          | 0     | 0                | 0                 | 1                   | 0         | 0      | 0              | 0                      | 1              | 2     | 2                | 4     | 4                | 2       | 1       | 0                         | 0                                | 0                       | 0                    | 0          | 0                    | 0              | 0                                                               | 0                              | 0                                             | 0                                            | 3     | 7                | 7                |   |   |
| 53           | MT-TL1                  | 1        | 1             | 0                         | 1                    | 3     | 2                | 0                   | 0            | 0        | 0      | 0            | 1          | 1                          | 2     | 2                | 0                 | 0                   | 1         | 0      | 1              | 0                      | 1              | 3     | 3                | 7     | 4                | 2       | 1       | 0                         | 0                                | 0                       | 0                    | 0          | 0                    | 0              | 1                                                               | 0                              | 0                                             | 0                                            | 4     | 8                | 8                |   |   |
| 54           | MT-TL1                  | 1        | 1             | 0                         | 1                    | 3     | 2                | 0                   | 0            | 0        | 0      | 0            | 0          | 1                          | 1     | 1                | 0                 | 0                   | 0         | 0      | 1              | 0                      | 1              | 2     | 2                | 5     | 4                | 2       | 0       | 0                         | 0                                | 0                       | 0                    | 0          | 0                    | 0              | 0                                                               | 0                              | 0                                             | 0                                            | 2     | 6                | 6                |   |   |
| 72           | MT-TL1                  | 0        | 1             | 0                         | 0                    | 1     | 1                | 0                   | 0            | 0        | 1      | 0            | 0          | 1                          | 2     | 2                | 0                 | 0                   | 1         | 0      | 1              | 0                      | 1              | 3     | 3                | 6     | 4                | 2       | 0       | 0                         | 0                                | 0                       | 1                    | 0          | 2                    | 0              | 0                                                               | 0                              | 1                                             | 0                                            | 6     | 8                | 8                |   |   |
| 40           | MT-TL1                  | 0        | 1             | 0                         | 0                    | 1     | 1                | 0                   | 0            | 0        | 0      | 0            | 0          | 0                          | 0     | 0                | 0                 | 1                   | 1         | 0      | 1              | 1                      | 5              | 3     | 4                | 4     | 0                | 0       | 0       | 0                         | 0                                | 0                       | 0                    | 0          | 0                    | 0              | 0                                                               | 0                              | 0                                             | 0                                            | 0     | 4                | 4                | 4 |   |
| 51           | MT-TN                   | 1        | 0             | 0                         | 0                    | 1     | 1                | 1                   | 0            | 0        | 0      | 1            | 0          | 1                          | 3     | 2                | 0                 | 0                   | 1         | 0      | 0              | 1                      | 0              | 3     | 3                | 6     | 4                | 2       | 0       | 0                         | 0                                | 0                       | 1                    | 0          | 0                    | 0              | 1                                                               | 0                              | 0                                             | 0                                            | 4     | 8                | 8                |   |   |
| 124          | TWINK                   | 1        | 1             | 0                         | 0                    | 2     | 2                | 0                   | 0            | 0        | 0      | 0            | 1          | 0                          | 1     | 1                | 0                 | 0                   | 0         | 0      | 0              | 0                      | 0              | 0     | 0                | 3     | 3                | 0       | 0       | 0                         | 0                                | 0                       | 0                    | 0          | 0                    | 0              | 0                                                               | 0                              | 0                                             | 0                                            | 0     | 3                | 3                | 3 |   |
| 35           | POLG                    | 0        | 0             | 0                         | 0                    | 0     | 0                | 0                   | 0            | 0        | 1      | 1            | 0          | 0                          | 2     | 2                | 1                 | 1                   | 0         | 0      | 0              | 0                      | 0              | 2     | 2                | 4     | 4                | 0       | 0       | 1                         | 1                                | 0                       | 0                    | 0          | 0                    | 0              | 1                                                               | 0                              | 0                                             | 0                                            | 3     | 7                | 7                |   |   |
| 38           | POLG                    | 0        | 0             | 0                         | 0                    | 0     | 0                | 0                   | 0            | 0        | 0      | 0            | 0          | 1                          | 1     | 1                | 1                 | 1                   | 0         | 1      | 0              | 0                      | 0              | 3     | 3                | 4     | 4                | 2       | 0       | 0                         | 0                                | 0                       | 0                    | 0          | 0                    | 0              | 1                                                               | 0                              | 0                                             | 3                                            | 7     | 7                |                  |   |   |
| 120          | POLG                    | 1        | 1             | 0                         | 1                    | 3     | 2                | 0                   | 0            | 0        | 0      | 0            | 0          | 0                          | 0     | 0                | 0                 | 0                   | 0         | 0      | 0              | 0                      | 0              | 0     | 2                | 2     | 2                | 2       | 0       | 0                         | 1                                | 0                       | 0                    | 0          | 0                    | 0              | 0                                                               | 0                              | 0                                             | 1                                            | 3     | 3                | 3                |   |   |
| 59           | ATAD3                   | 0        | 0             | 1                         | 0                    | 1     | 1                | 1                   | 1            | 0        | 0      | 1            | 1          | 0                          | 4     | 2                | 0                 | 0                   | 1         | 0      | 0              | 0                      | 0              | 2     | 2                | 5     | 4                | 0       | 0       | 1                         | 0                                | 1                       | 0                    | 0          | 0                    | 0              | 0                                                               | 0                              | 0                                             | 2                                            | 6     | 6                | 6                |   |   |
| 2130         | PDHA1                   | 0        | 0             | 1                         | 0                    | 1     | 1                | 1                   | 1            | 0        | 1      | 0            | 1          | 5                          | 2     | 0                | 0                 | 0                   | 0         | 0      | 0              | 0                      | 0              | 0     | 3                | 3     | 3                | 3       | 2       | 1                         | 0                                | 0                       | 0                    | 0          | 0                    | 0              | 0                                                               | 0                              | 0                                             | 0                                            | 3     | 6                | 6                |   |   |
| 31           | PDHA1                   | 0        | 0             | 1                         | 0                    | 1     | 1                | 1                   | 1            | 0        | 0      | 0            | 0          | 1                          | 3     | 2                | 1                 | 0                   | 0         | 0      | 1              | 0                      | 0              | 2     | 2                | 5     | 4                | 2       | 1       | 1                         | 0                                | 0                       | 1                    | 0          | 0                    | 0              | 0                                                               | 1                              | 6                                             | 8                                            | 8     |                  |                  |   |   |
| 128          | SLC25A42                | 1        | 1             | 0                         | 1                    | 3     | 2                | 0                   | 0            | 0        | 0      | 0            | 0          | 0                          | 0     | 0                | 1                 | 0                   | 0         | 0      | 0              | 0                      | 1              | 2     | 2                | 4     | 4                | 2       | 1       | 0                         | 0                                | 0                       | 0                    | 0          | 0                    | 0              | 0                                                               | 0                              | 0                                             | 3                                            | 7     | 7                |                  |   |   |
| 2738         | SLC25A42                | 1        | 0             | 1                         | 0                    | 2     | 2                | 0                   | 0            | 1        | 0      | 1            | 1          | 0                          | 4     | 2                | 0                 | 0                   | 1         | 0      | 0              | 0                      | 0              | 1     | 1                | 5     | 4                | 2       | 0       | 0                         | 0                                | 0                       | 0                    | 0          | 0                    | 0              | 0                                                               | 0                              | 0                                             | 2                                            | 6     | 6                |                  |   |   |

0

Highest

7

8

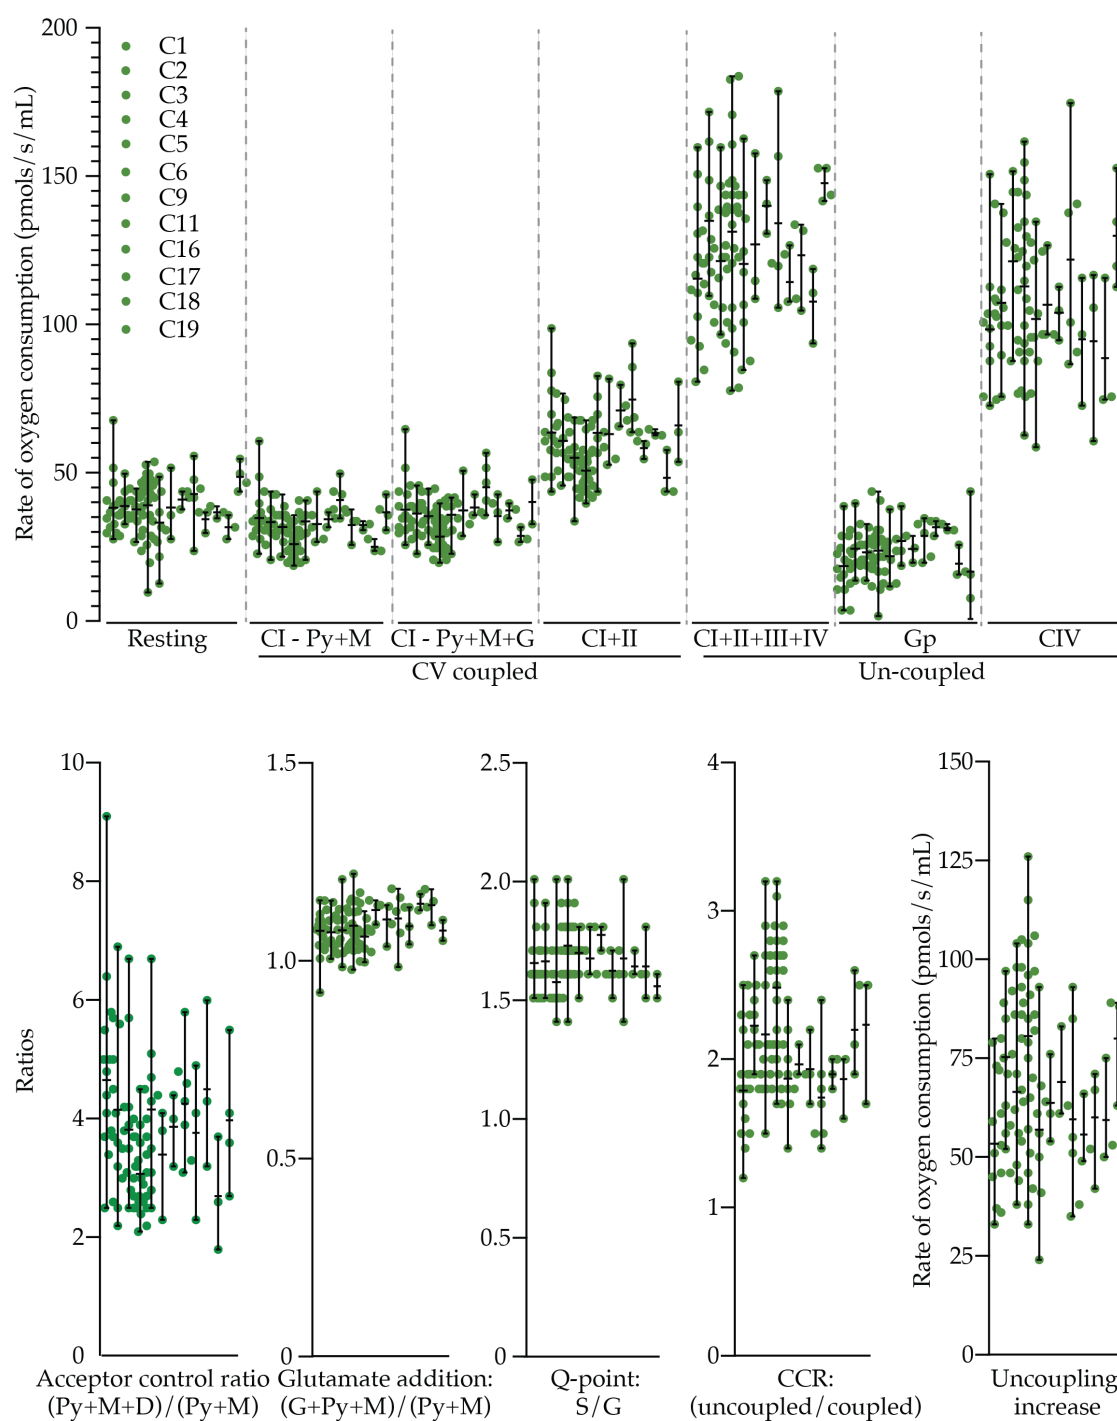

9

10 **Figure S1. Technical replicates for oxygraphy testing in control fibroblasts cells.** Resting, coupled,  
 11 uncoupled rates of respiration and derived values. Mean is displayed for each control, and error bars  
 12 show range of technical replicates, Abbreviations: C1-19, controls 1-19; CI-V, OXPHOS complexes I-  
 13 V; CCR, coupling control ratio; Gp, glycerophosphate; G, glutamate; M, malate; Py, pyruvate; S,  
 14 succinate.

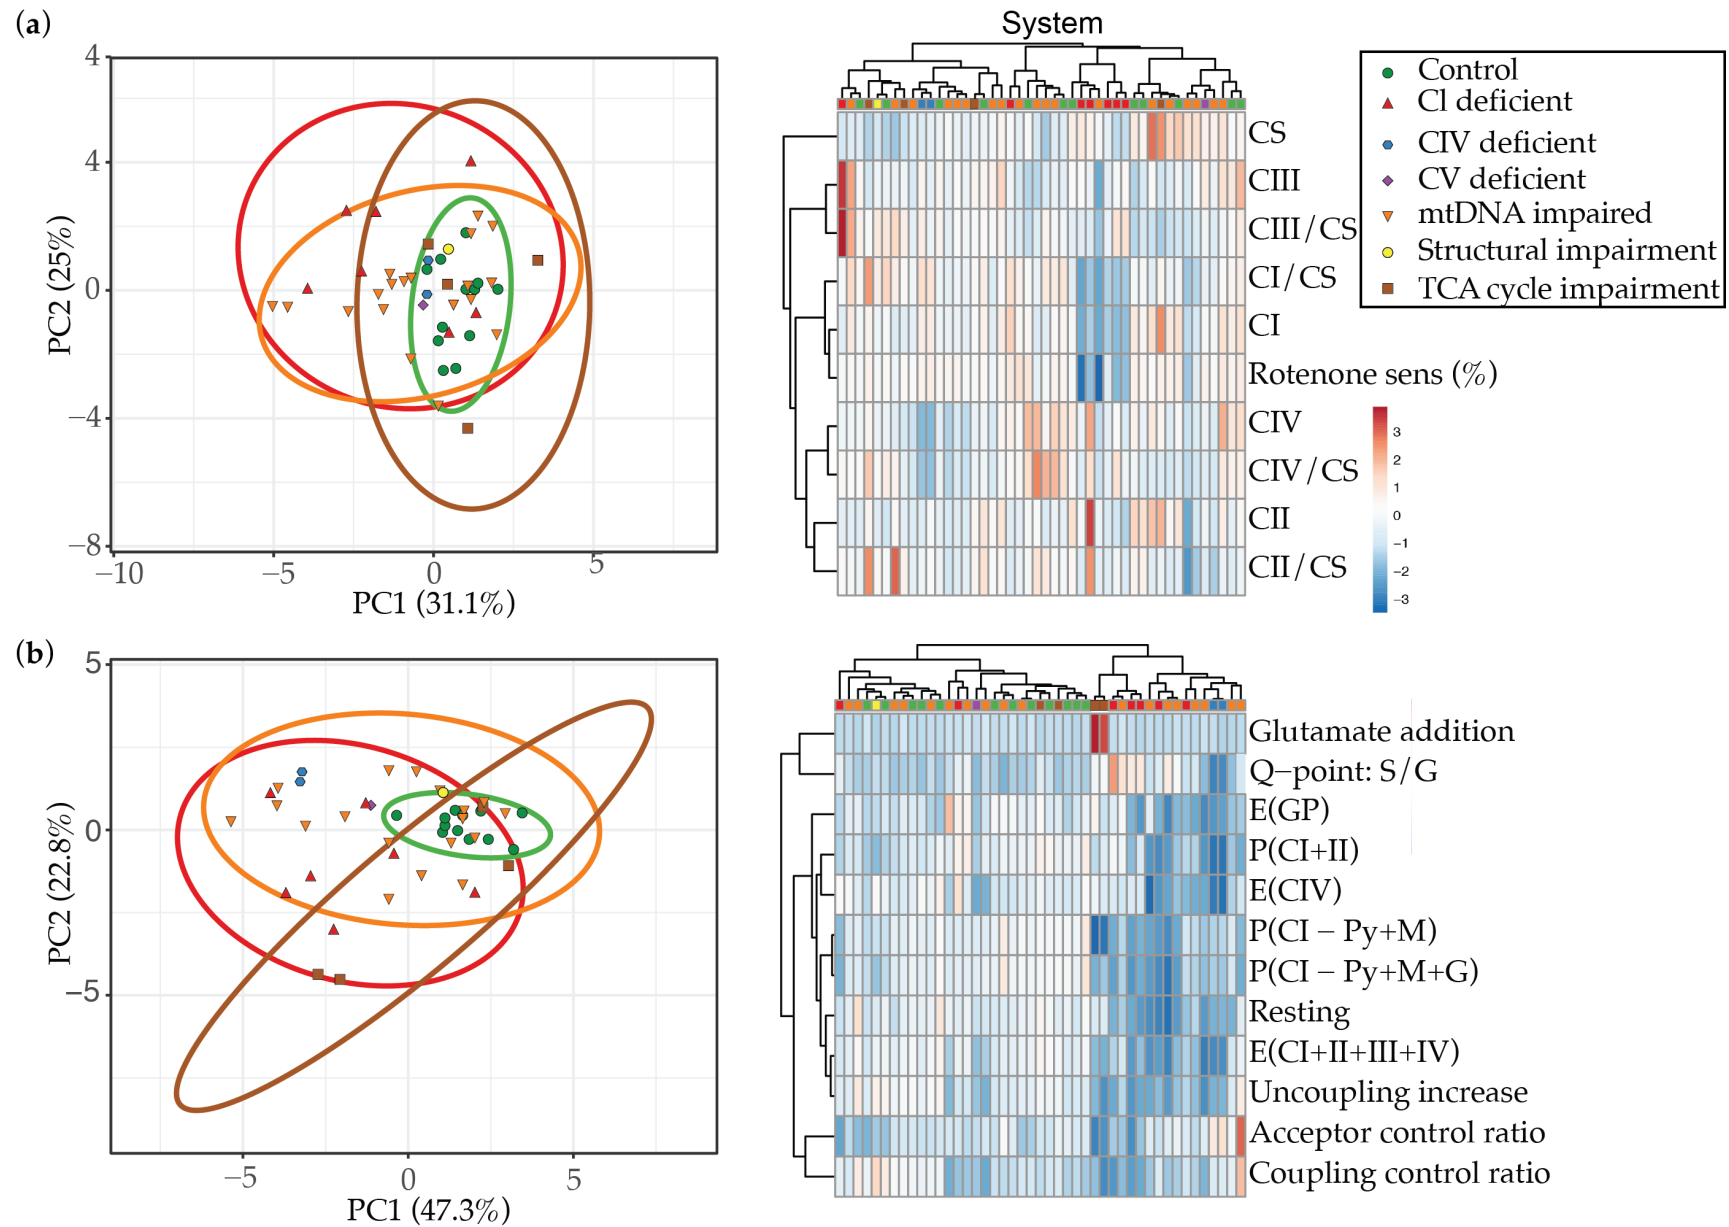

**Figure S2. Principal component and heat map analysis of enzymology and oxygraphy results.** (a) Enzymology and (b) oxygraphy results were analysed using the ClustVis tool [1], and presented here as PCA plots and heat maps. For PCA plots, unit variance scaling is applied to rows; SVD with imputation is used to calculate principal components. X and Y axis show principal component 1 and principal component 2 that explain (a) 31.3% and 25% and (b) 47.3% and 22.8% of the total variance, respectively. Prediction ellipses are such that with probability 0.95, a new observation from the same group will fall inside the ellipse. For heat maps, rows are centred; unit variance scaling is applied to rows. Imputation is used for missing value estimation. Both rows and columns are clustered using correlation distance and average linkage.

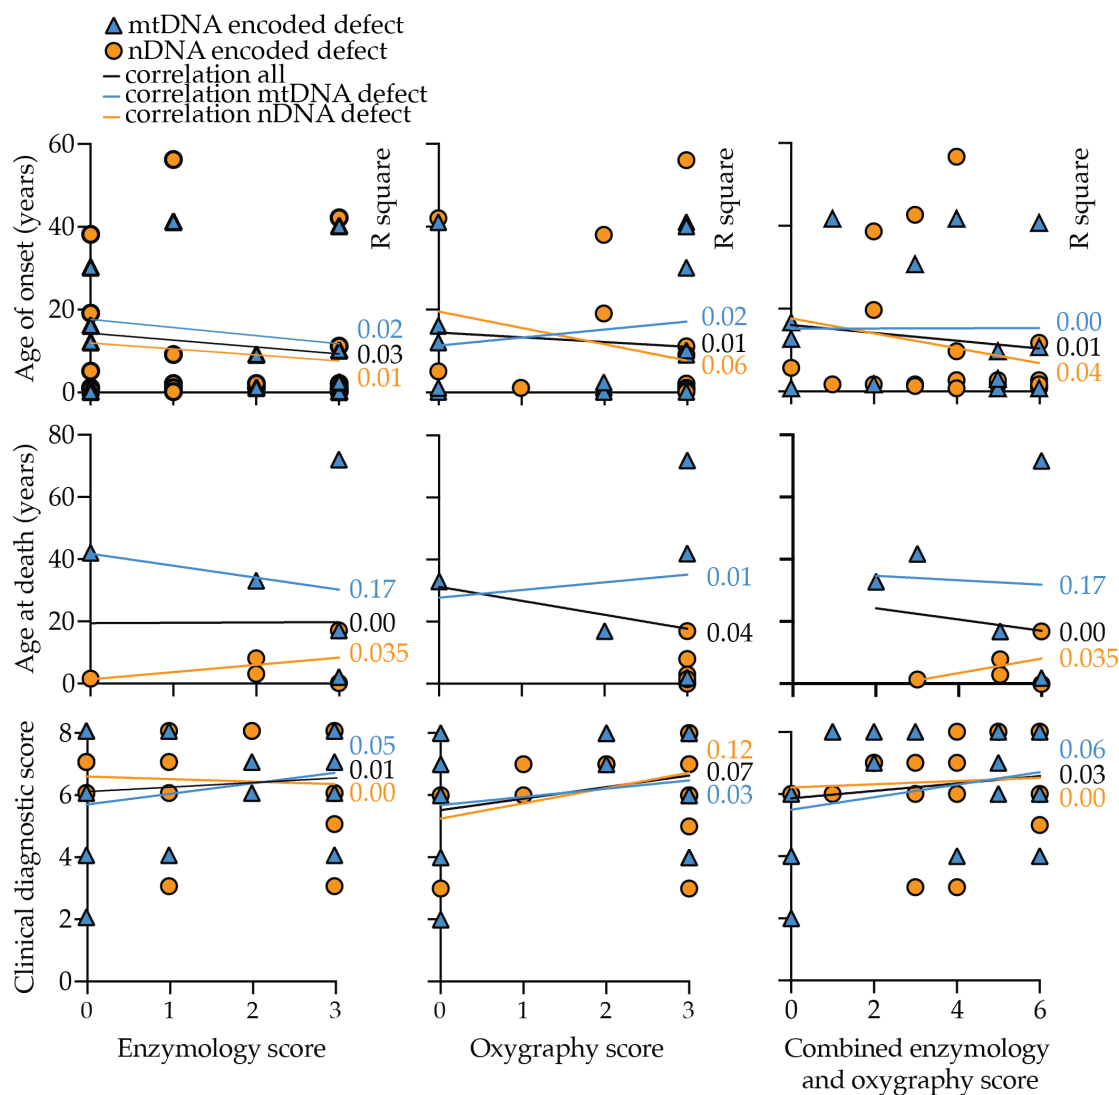

**Figure S3.** Biochemical correlations with disease characteristics. The disease predictions made through the enzymological and oxygraphy methods on PMD patient fibroblasts (subdivided into mtDNA or nDNA encoded mutations) based on the Z scores (see materials and methods) were converted to scores: Unlikely, 0; possible, 1; likely, 2; and very likely, 3. These were then correlated against the age of onset of disease, the clinical diagnostic score or the age of death (if applicable). R square values for correlations are displayed as generated in Prism 8.

## References

1. Metsalu, T.; Vilo, J. ClustVis: a web tool for visualizing clustering of multivariate data using Principal Component Analysis and heatmap. *Nucleic Acids Res* **2015**, *43*, W566-570, doi:10.1093/nar/gkv468.
